# Supplementary material for: Establishing tungsten carbides as active catalysts for CO2 hydrogenation
Source: Royal Society of Chemistry journal article supplement (doi:10.1039/d2nr03281c), 2022-01-01
Supplement: d2nr03281c1.pdf [file d2nr03281c1.pdf]

**SUPPORTING INFORMATION FOR:**  
**Establishing tungsten carbides as active catalysts for CO<sub>2</sub> hydrogenation**

**Pulse oxidation quantification of active sites for estimating turnover frequency (TOF):**

$$TOF = \frac{F_{CO_2} * X}{n_{W_xC}}$$

Where  $F_{CO_2}$  is the inlet molar flow rate of CO<sub>2</sub>, X is CO<sub>2</sub> conversion, and  $n_{W_xC}$  is the number of moles of W<sub>x</sub>C, determined by pulse oxidation (found in Table 1). For active site quantification, we assume each WC site adsorbs and reacts with two oxygen molecules to form the passivation layer of tungsten oxides.

**Supporting Figures and Tables:**

**Table S1.** Median and average particle size of IWI and M catalysts carburized at 835 °C for 2 hours, 5 hours and 10 hours with reported standard deviations.

| Catalyst          | Median Particle Size (nm) | Average Particle Size (nm) |
|-------------------|---------------------------|----------------------------|
| M 835 °C - 2hr    | 9.4 ± 7.5                 | 12.4 ± 7.5                 |
| M 835 °C - 5hr    | 8.3 ± 8.1                 | 10.9 ± 8.1                 |
| M 835 °C - 10hr   | 11.1 ± 8.4                | 12.9 ± 8.4                 |
| IWI 835 °C - 2hr  | 11.7 ± 6.7                | 12.3 ± 6.7                 |
| IWI 835 °C - 5hr  | 11.1 ± 7.0                | 11.7 ± 7.0                 |
| IWI 835 °C - 10hr | 8.7 ± 4.6                 | 9.1 ± 4.6                  |

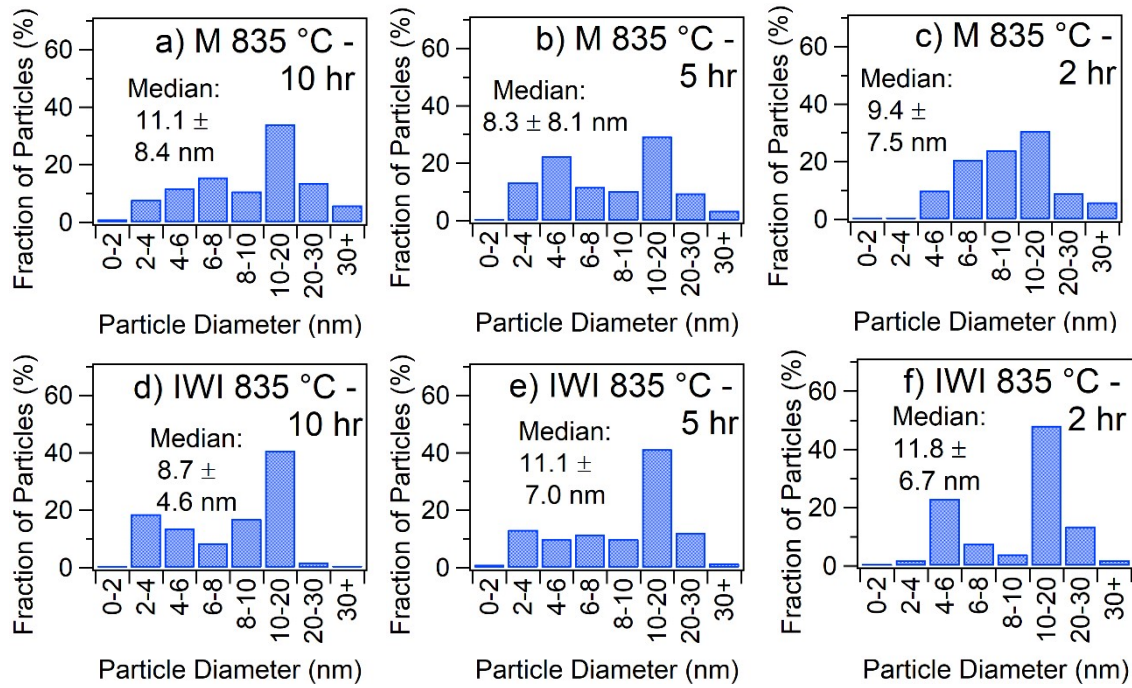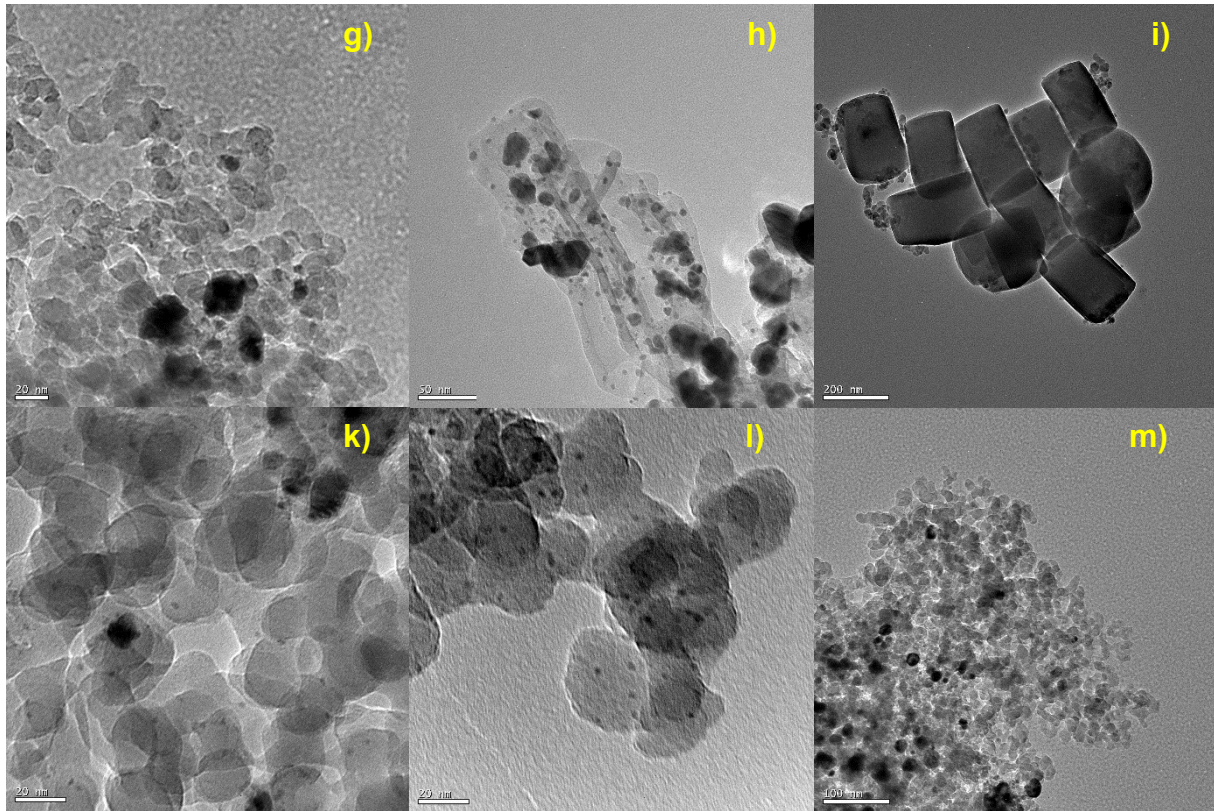

**Figure S1.** Particle size distributions of nano- $W_xC$  (M) carburized at 835 °C for a) 10 hours, b) 5 hours, and c) 2 hours, and IWI  $W_xC$  carburized at 835 °C for d) 10 hours, e) 5 hours and f) 2 hours with corresponding TEM images (g-m).

**Table S2.** BET surface areas of IWI and M catalysts.

| Catalyst              | BET Surface Area (m <sup>2</sup> /g) |     |
|-----------------------|--------------------------------------|-----|
|                       | IWI                                  | M   |
| Calcined at 550 °C    | 149                                  | 99  |
| Carburized at 600 °C  | 128                                  | 1.7 |
| Carburized at 835 °C  | 173                                  | 98  |
| Carburized at 1000 °C | 112                                  | 68  |

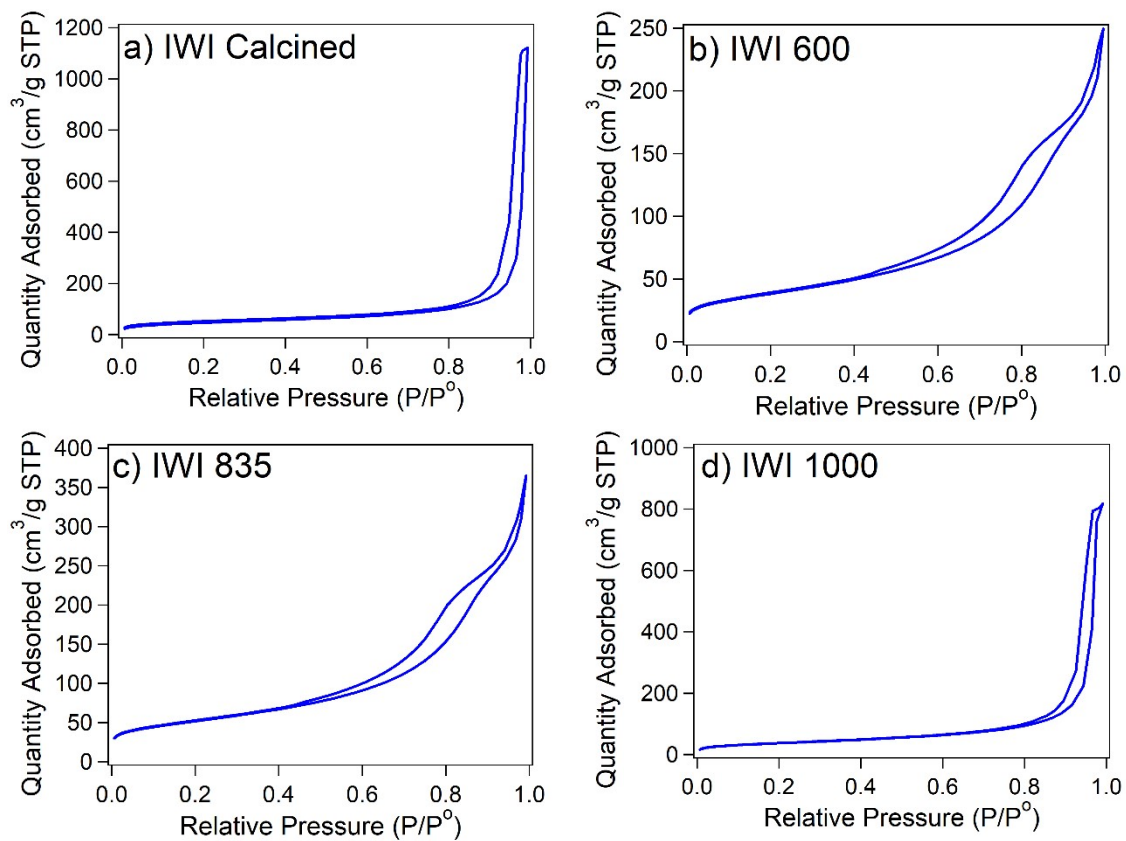

**Figure S2.** BET Isotherms of IWI catalysts. a) Calcined and b-d) carburized at each respective temperature.

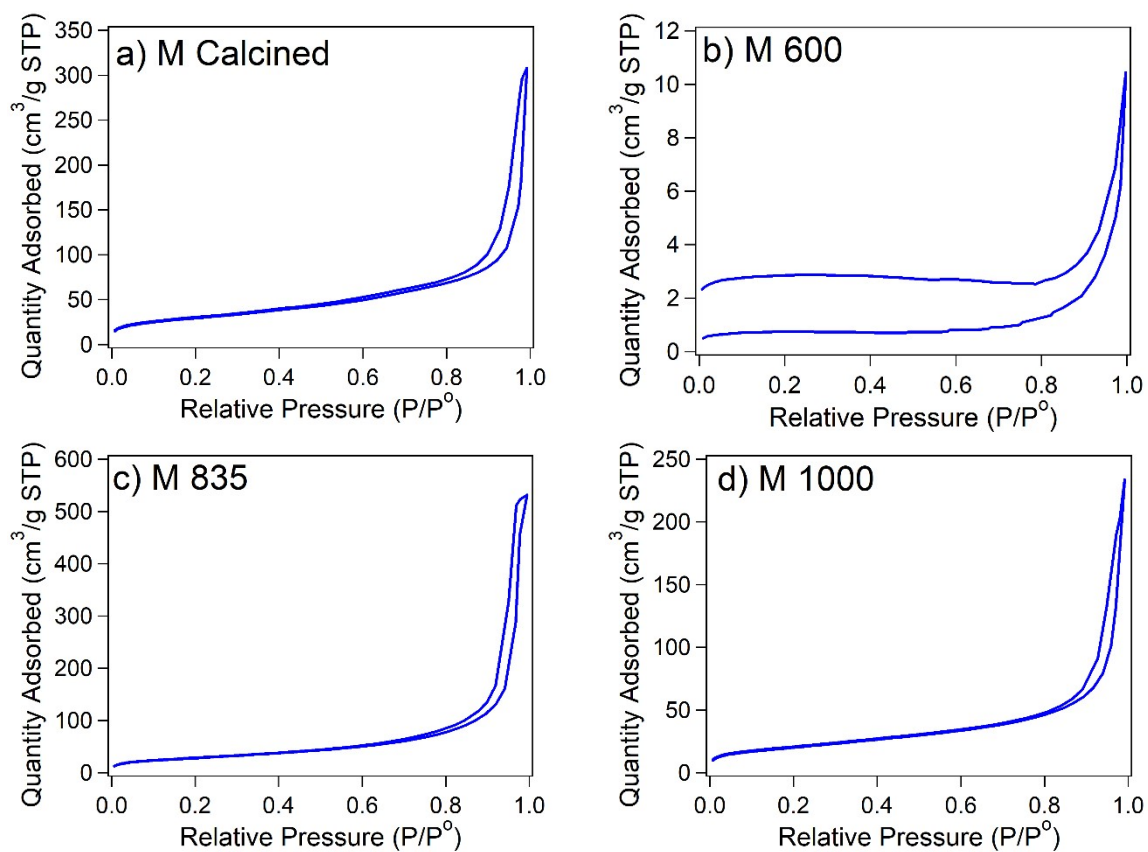

**Figure S3.** BET Isotherms of M catalysts. a) Calcined and b-d) carburized at each respective temperature.

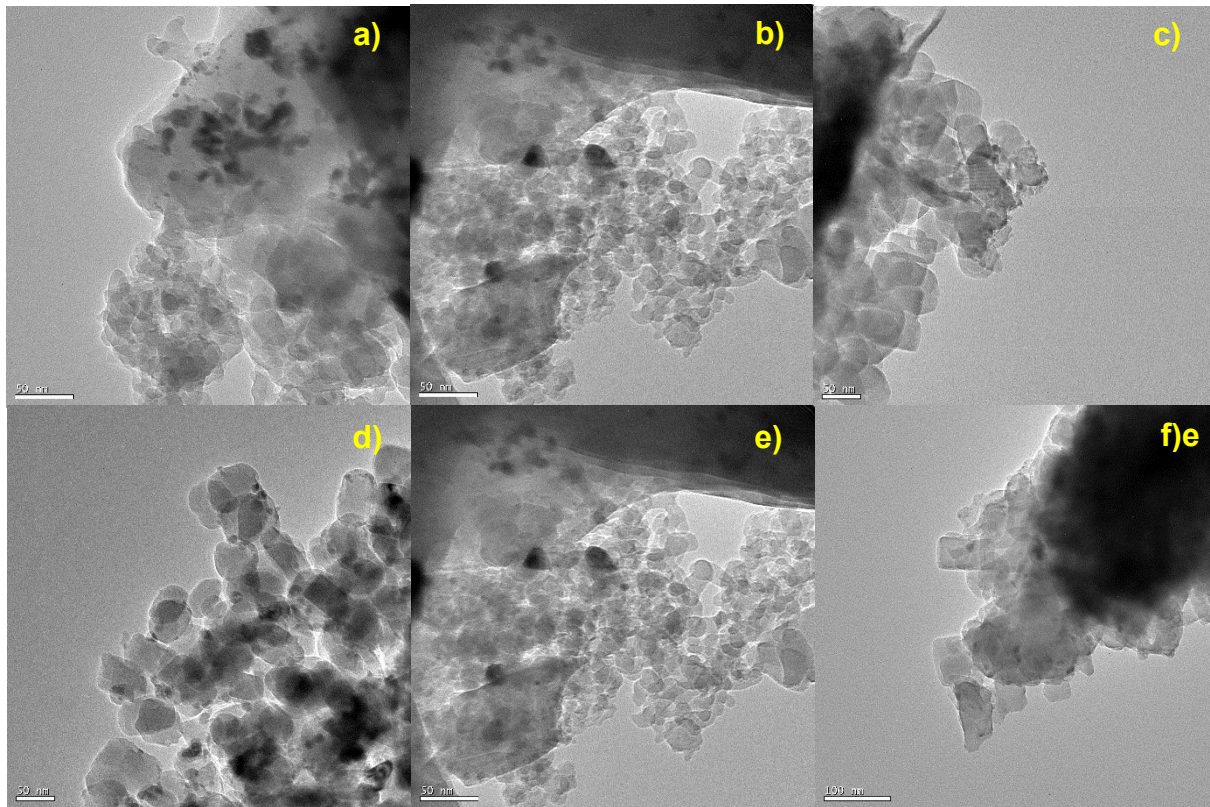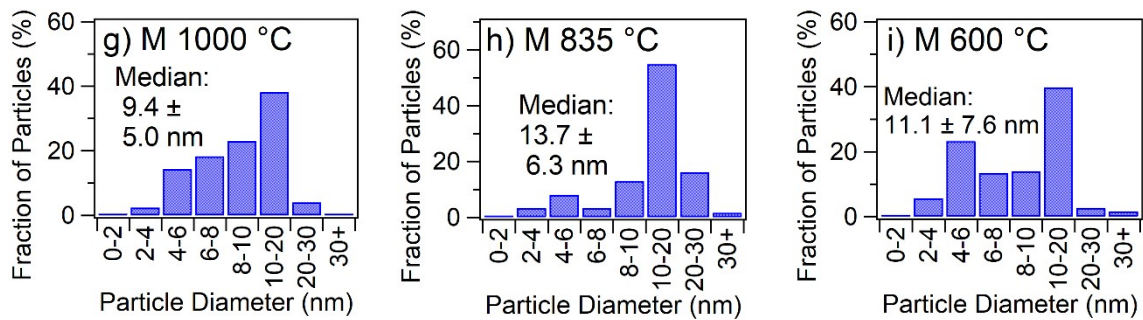

**Figure S4.** TEM images with 50 nm scale bar of nano- $W_xC$  after 12 hrs on stream during RWGS, and carburized at a,d) 1000 °C, b,e) 835 °C, and c,f) 600 °C, with respective particle size distributions (g-i).

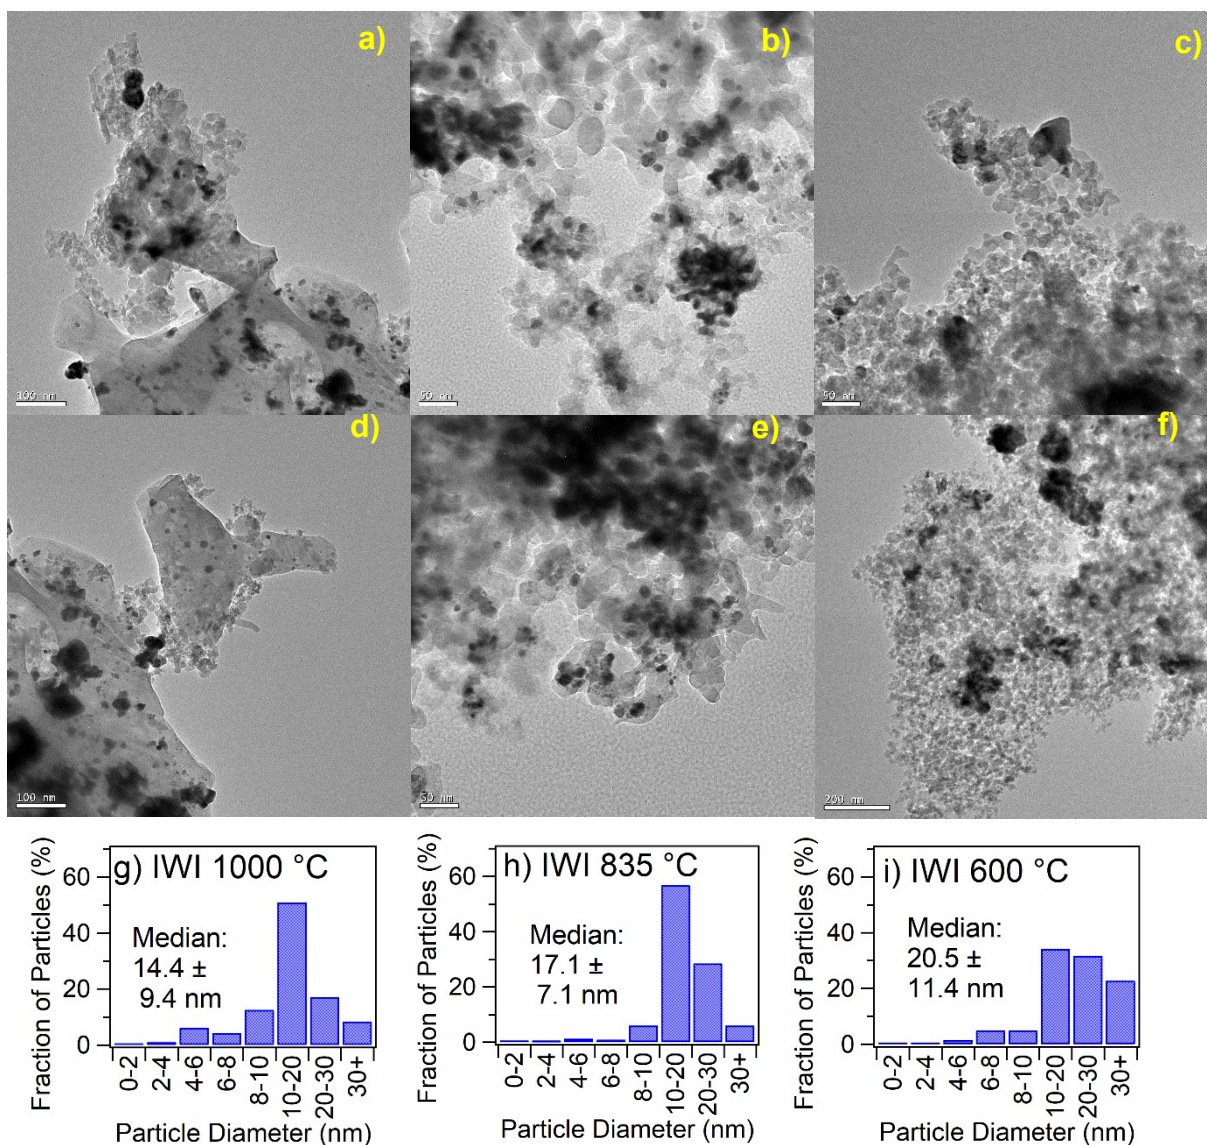

**Figure S5.** TEM images with 50 nm scale bar of IWI W<sub>x</sub>C after 12 hrs on stream during RWGS, and carburized at a,d) 1000 °C, b,e) 835 °C, and c,f) 600 °C, and respective particle size distributions (g-i).

**Table S3.** Median particle size of IWI and M catalysts carburized at 600 °C, 835 °C, and 1000 °C with reported standard deviation for as-synthesized and post-RWGS catalysts.

| Carburization Temperature (°C) | IWI Median Particle Size<br>± Std. Dev. (nm) |             | M Median Particle Size<br>± Std. Dev. (nm) |            |
|--------------------------------|----------------------------------------------|-------------|--------------------------------------------|------------|
|                                | As-Synthesized                               | Post-RWGS   | As-Synthesized                             | Post-RWGS  |
| <b>600</b>                     | 13.7 ± 5.8                                   | 20.5 ± 11.4 | 15.7 ± 8.4                                 | 11.1 ± 7.6 |
| <b>835</b>                     | 11.1 ± 7.0                                   | 17.1 ± 7.1  | 7.2 ± 6.1                                  | 13.7 ± 6.3 |
| <b>1000</b>                    | 13.0 ± 7.4                                   | 14.4 ± 9.4  | 6.7 ± 7.3                                  | 9.4 ± 5.0  |

**Table S4.** Cumulative quantities of adsorbed O<sub>2</sub> during pulse oxidation with 1% O<sub>2</sub>/N<sub>2</sub>.

| Catalyst        | Cumulative Quantity of O <sub>2</sub> Adsorbed (μmol/g) |
|-----------------|---------------------------------------------------------|
| <b>M 600</b>    | 2.5                                                     |
| <b>M 835</b>    | 2.6                                                     |
| <b>M 1000</b>   | 2.7                                                     |
| <b>IWI 600</b>  | 2.7                                                     |
| <b>IWI 835</b>  | 6.4                                                     |
| <b>IWI 1000</b> | 2.5                                                     |

**Table S5.** ICP-MS Loadings of IWI and M catalysts carburized at 600 °C, 835 °C and 1000 °C.

| Catalyst           | Tungsten Weight Percent (%) | Sodium Weight Percent (%) |
|--------------------|-----------------------------|---------------------------|
| <b>M 600 °C</b>    | 6.2                         | 8.0                       |
| <b>M 835 °C</b>    | 6.8                         | 8.0                       |
| <b>M 1000 °C</b>   | 7.4                         | 8.0                       |
| <b>IWI 600 °C</b>  | 6.2                         | 0.02                      |
| <b>IWI 835 °C</b>  | 7.1                         | 0.02                      |
| <b>IWI 1000 °C</b> | 8.5                         | 0.02                      |

**Table S6.** Peak positions and FWHM for fit XPS spectra.

| <b>Component</b>      |                               | <b>IWI<br/>600 °C</b> | <b>IWI<br/>835 °C</b> | <b>IWI<br/>1000 °C</b> | <b>M<br/>600 °C</b> | <b>M<br/>835 °C</b> | <b>M<br/>1000 °C</b> |
|-----------------------|-------------------------------|-----------------------|-----------------------|------------------------|---------------------|---------------------|----------------------|
| <b>W</b>              | <b>Peak<br/>Position (eV)</b> | 31.0                  | 31.2                  | 30.3                   | 30.8                | 30.3                | 30.9                 |
|                       | <b>FWHM</b>                   | 0.8                   | 1.0                   | 1.3                    | 0.9                 | 1.1                 | 1.3                  |
| <b>W<sub>2</sub>C</b> | <b>Peak<br/>Position (eV)</b> | 31.4                  | 31.5                  | 31.6                   | 31.3                | 31.2                | 31.2                 |
|                       | <b>FWHM</b>                   | 1.2                   | 1.2                   | 1.1                    | 0.8                 | 0.9                 | 1.8                  |
| <b>WC</b>             | <b>Peak<br/>Position (eV)</b> | 31.8                  | 32.3                  | 32.5                   | 31.9                | 31.8                | 32.0                 |
|                       | <b>FWHM</b>                   | 0.8                   | 1.2                   | 0.8                    | 1.2                 | 0.8                 | 1.1                  |
| <b>WO<sub>2</sub></b> | <b>Peak<br/>Position (eV)</b> | 32.9                  | 32.9                  | 33.3                   | 33.0                | 32.9                | 32.8                 |
|                       | <b>FWHM</b>                   | 1.8                   | 1.5                   | 1.8                    | 1.4                 | 0.8                 | 1.8                  |
| <b>WO<sub>3</sub></b> | <b>Peak<br/>Position (eV)</b> | 35.6                  | 35.6                  | 36.2                   | 35.2                | 35.2                | 35.3                 |
|                       | <b>FWHM</b>                   | 2.0                   | 2.0                   | 2.0                    | 1.8                 | 2.0                 | 2.0                  |



**Table S7.** Selected catalysts for benchmarking catalytic performance of IWI and M W<sub>x</sub>C catalysts. The asterisk (\*) indicates this work.

| Catalyst                                                              | T (°C)     | P (MPa)    | H <sub>2</sub> :CO <sub>2</sub> Ratio | GHSV (L/kg/s) | Conversion (%) | Carbon-based Selectivity (%) |                 |                          | CO Yield (%) | CO STY (μmol CO/gcat/s) | CO Production (kg CO/kgMetal/Day) |
|-----------------------------------------------------------------------|------------|------------|---------------------------------------|---------------|----------------|------------------------------|-----------------|--------------------------|--------------|-------------------------|-----------------------------------|
|                                                                       |            |            |                                       |               |                | CO                           | CH <sub>4</sub> | C <sub>2+</sub> Products |              |                         |                                   |
| <b>M 600 *</b>                                                        | <b>350</b> | <b>2.1</b> | <b>3</b>                              | <b>7.5</b>    | <b>2.5</b>     | <b>96.5</b>                  | <b>3.5</b>      | <b>0</b>                 | <b>2.4</b>   | <b>1.80</b>             | <b>29.0</b>                       |
| <b>M 835 *</b>                                                        | <b>350</b> | <b>2.1</b> | <b>3</b>                              | <b>7.5</b>    | <b>4.9</b>     | <b>99.2</b>                  | <b>0.8</b>      | <b>0</b>                 | <b>4.9</b>   | <b>3.62</b>             | <b>58.3</b>                       |
| <b>M 1000 *</b>                                                       | <b>350</b> | <b>2.1</b> | <b>3</b>                              | <b>7.5</b>    | <b>13.9</b>    | <b>94.6</b>                  | <b>5</b>        | <b>0.4</b>               | <b>13.1</b>  | <b>9.78</b>             | <b>157.8</b>                      |
| <b>IWI 600 *</b>                                                      | <b>350</b> | <b>2.1</b> | <b>3</b>                              | <b>7.5</b>    | <b>6.5</b>     | <b>88</b>                    | <b>11.3</b>     | <b>0.7</b>               | <b>5.7</b>   | <b>4.26</b>             | <b>68.6</b>                       |
| <b>IWI 835 *</b>                                                      | <b>350</b> | <b>2.1</b> | <b>3</b>                              | <b>7.5</b>    | <b>9.2</b>     | <b>94.9</b>                  | <b>4.9</b>      | <b>0.2</b>               | <b>8.7</b>   | <b>6.50</b>             | <b>104.8</b>                      |
| <b>IWI 1000 *</b>                                                     | <b>350</b> | <b>2.1</b> | <b>3</b>                              | <b>7.5</b>    | <b>5.9</b>     | <b>86.3</b>                  | <b>12.9</b>     | <b>0.8</b>               | <b>5.1</b>   | <b>3.79</b>             | <b>61.1</b>                       |
| WC <sup>[1]</sup>                                                     | 300        | 2          | 3                                     | 1.0           | 8.8            | 89.9                         | 10.1            | 0                        | 7.9          | 1.18                    | 8.9                               |
| WC <sup>[1]</sup>                                                     | 350        | 2          | 3                                     | 1.0           | 24.3           | 88.0                         | 12.0            | 0                        | 21.4         | 3.18                    | 24.1                              |
| KWC <sup>[1]</sup>                                                    | 300        | 2          | 3                                     | 1.0           | 4.8            | 100.0                        | 0.0             | 0                        | 4.8          | 0.71                    | 5.4                               |
| KWC <sup>[1]</sup>                                                    | 350        | 2          | 3                                     | 1.0           | 20.3           | 98.1                         | 1.9             | 0                        | 19.9         | 2.96                    | 22.4                              |
| NaWC                                                                  | 300        | 2          | 3                                     | 1.0           | 1.9            | 100.0                        | 0.0             | 0                        | 1.9          | 0.28                    | 2.1                               |
| NaWC <sup>[1]</sup>                                                   | 350        | 2          | 3                                     | 1.0           | 13.6           | 100.0                        | 0.0             | 0                        | 13.6         | 2.02                    | 15.3                              |
| Cu-ZnO <sup>[1]</sup>                                                 | 270        | 3          | 3                                     | 5.6           | 5.3            | 93.2                         | 0.0             | 6.8                      | 4.9          | 2.45                    | 59.3                              |
| Cu/Mo <sub>2</sub> C <sup>[2]</sup>                                   | 300        | 2          | 5                                     | 2.5           | 19.0           | 38.0                         | 32.0            | 30.0                     | 7.2          | 1.21                    | 5.8                               |
| Ni/Mo <sub>2</sub> C <sup>[2]</sup>                                   | 300        | 2          | 5                                     | 2.5           | 29.0           | 29.0                         | 64.0            | 7.0                      | 8.4          | 1.41                    | 6.8                               |
| Co/Mo <sub>2</sub> C <sup>[2]</sup>                                   | 300        | 2          | 5                                     | 2.5           | 31.0           | 19.0                         | 37.0            | 44.0                     | 5.9          | 0.99                    | 4.8                               |
| Low T WGS Industrial Cu <sup>[3]</sup>                                | 300        | 2.1        | 3                                     | 36.7          | 23.3           | 92.6                         | 4.6             | 2.8                      | 21.6         | 80.2                    | 194.0                             |
| High T WGS Industrial FeCrOx                                          | 450        | 2.1        | 3                                     | 36.7          | 47.5           | 48.6                         | 37.3            | 7.3                      | 23.1         | 85.8                    | 207.7                             |
| P-K-Mo <sub>2</sub> C/γ-Al <sub>2</sub> O <sub>3</sub> <sup>[3]</sup> | 300        | 2.1        | 3                                     | 36.7          | 1.2            | 99.2                         | 0.8             | 0.0                      | 1.2          | 4.3                     | 52.9                              |
| P-K-Mo <sub>2</sub> C/γ-Al <sub>2</sub> O <sub>3</sub> <sup>[3]</sup> | 450        | 2.1        | 3                                     | 36.7          | 26.8           | 99.3                         | 0.3             | 0.4                      | 26.6         | 99.1                    | 1219.0                            |
| P-K-Mo <sub>2</sub> C/γ-Al <sub>2</sub> O <sub>3</sub> <sup>[3]</sup> | 450        | 2.1        | 3                                     | 18.3          | 33.1           | 99.9                         | 0.1             | 0.0                      | 33.0         | 61.4                    | 755.6                             |
| P-K-Mo <sub>2</sub> C/γ-Al <sub>2</sub> O <sub>3</sub> <sup>[3]</sup> | 450        | 2.1        | 3                                     | 1.8           | 42.1           | 99.1                         | 0.8             | 0.2                      | 41.7         | 7.8                     | 95.5                              |
| L-K-Mo <sub>2</sub> C/γ-Al <sub>2</sub> O <sub>3</sub> <sup>[3]</sup> | 450        | 2.1        | 3                                     | 36.7          | 22.1           | 97.3                         | 2.0             | 0.7                      | 21.5         | 80.0                    | 984.2                             |

## References

- [1] J. R. Morse, M. Juneau, J. W. Baldwin, M. D. Porosoff, H. D. Willauer, *Journal of CO<sub>2</sub> Utilization* **2020**, *35*, 38-46.
- [2] W. Xu, P. J. Ramírez, D. Stacchiola, J. L. Brito, J. A. Rodriguez, *Catalysis Letters* **2015**, *145*, 1365-1373.
- [3] M. Juneau, M. Vonglis, J. Hartvigsen, L. Frost, D. Bayerl, M. Dixit, G. Mpourmpakis, J. R. Morse, J. W. Baldwin, H. D. Willauer, M. D. Porosoff, *Energy & Environmental Science* **2020**.
